# Supplementary material
Source: publisher site journal article supplement (https://www.spandidos-publications.com/852/downloadSupplementary)

Figure S1. Western blot analysis of LC3B, mTOR protein from different treatment group. (A) Immunoblotting results of mTOR, LC3B expression at 1 day post-SE. (B) Western blot analysis of mTOR, LC3B expression at 1 day post-SE. Data are presented as mean  $\pm$  SD. \* $P < 0.05$  (vs. the previous group,  $n = 6$  rats per group). mTOR, mammalian target of rapamycin, SE, status epilepticus.

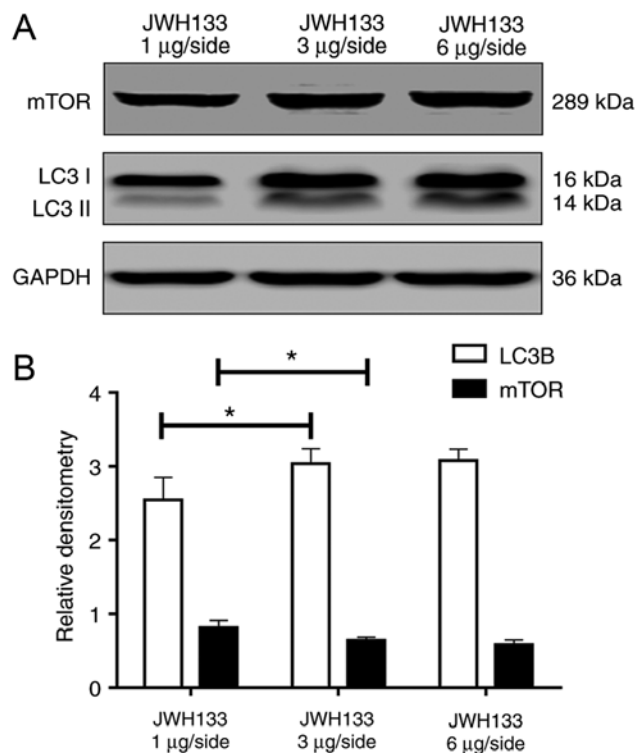

Supplement: Supplementary file 1 [file downloadSupplementary]
